# Supplementary material
Source: PubMed Central journal article supplement (PMC4380988)
Supplement: pro0024-0580-sd1.pdf [file pro0024-0580-sd1.pdf]

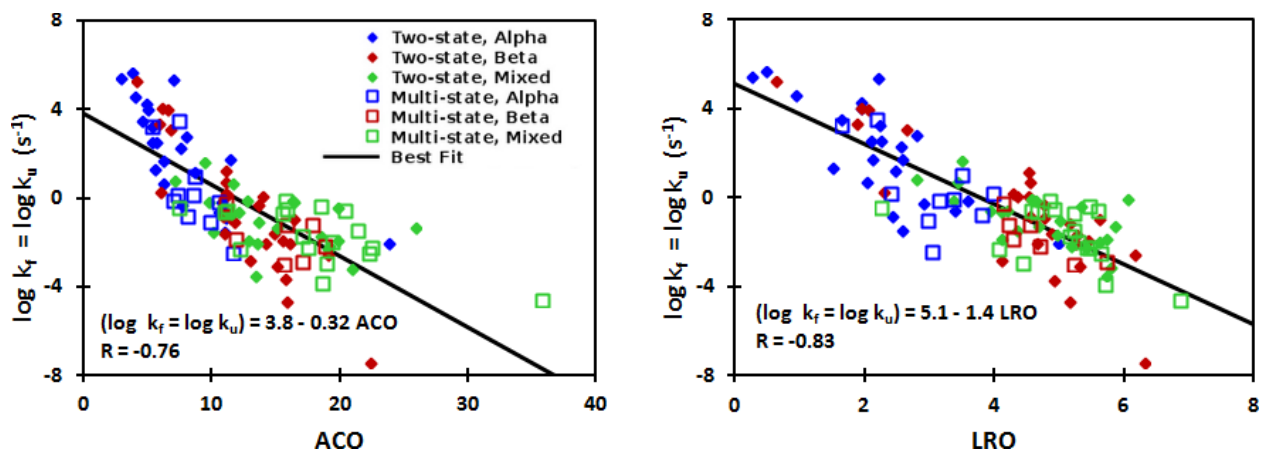

**Figure S1: Correlations between structural complexity and the rates of folding and unfolding at the transition midpoint.**

Correlations are shown for the folding/unfolding rate at the transition midpoint ( $\log k_f = \log k_u$ ) for A) ACO and B) LRO. Rates at the transition midpoint are used because the thermodynamic stability is zero allowing for the correction of effects owing to differing stabilities.

**Table S1.** Correlations and linear fits of unfolding and folding rate constants, measures of native structure and thermodynamic stability extended

| Parameter x | Parameter y           | Dataset (Size)   | Linear Fit: $y = b + m \cdot x$ |       | Pearson Correlation |                         |
|-------------|-----------------------|------------------|---------------------------------|-------|---------------------|-------------------------|
|             |                       |                  | m                               | b     | R                   | P <sup>a</sup>          |
| ACO         | $\log k_f = \log k_u$ | Full (108)       | -0.32                           | 3.8   | -0.76               | $8.2 \times 10^{-22}$   |
|             |                       | Two-State (73)   | -0.40                           | 4.7   | -0.80               | $2.0 \times 10^{-17}$   |
|             |                       | Multi-State (35) | -0.19                           | 1.7   | -0.70               | $2.3 \times 10^{-6}$    |
|             |                       | Alpha (33)       | -0.43                           | 4.9   | -0.71               | $3.4 \times 10^{-6}$    |
|             |                       | Beta (34)        | -0.52                           | 5.9   | -0.86               | $4.7 \times 10^{-11}$   |
|             |                       | Mixed (41)       | -0.14                           | 1.0   | -0.61               | $2.2 \times 10^{-5}$    |
|             |                       | Maxwell (28)     | -0.21                           | 2.2   | -0.69               | $4.6 \times 10^{-5}$    |
| LRO         | $\log k_f = \log k_u$ | Full (108)       | -1.4                            | 5.1   | -0.83               | $1.9 \times 10^{-28}$   |
|             |                       | Two-State (73)   | -1.4                            | 5.5   | -0.85               | $1.8 \times 10^{-21}$   |
|             |                       | Multi-State (35) | -0.98                           | 3.2   | -0.71               | $1.9 \times 10^{-6}$    |
|             |                       | Alpha (33)       | -1.8                            | 6.0   | -0.77               | $1.7 \times 10^{-7}$    |
|             |                       | Beta (34)        | -1.7                            | 6.6   | -0.85               | $1.3 \times 10^{-10}$   |
|             |                       | Mixed (41)       | -0.85                           | 2.8   | -0.61               | $2.3 \times 10^{-5}$    |
|             |                       | Maxwell (28)     | -1.2                            | 4.6   | -0.81               | $1.4 \times 10^{-7}$    |
| RCO         | $\log k_f$            | Full (108)       | -3.9                            | 2.5   | -0.08               | $3.9 \times 10^{-1}$ NS |
|             |                       | Two-State (73)   | -16                             | 4.9   | -0.34               | $2.8 \times 10^{-3}$    |
|             |                       | Multi-State (35) | -0.036                          | 1.1   | 0.00                | $1.0 \times 10^0$ NS    |
|             |                       | Alpha (33)       | 27                              | 0.7   | 0.51                | $2.4 \times 10^{-3}$    |
|             |                       | Beta (34)        | 7.7                             | 0.28  | 0.15                | $4.0 \times 10^{-1}$ NS |
|             |                       | Mixed (41)       | 12                              | -0.55 | 0.27                | $8.8 \times 10^{-2}$ NS |
|             |                       | Maxwell (28)     | -19                             | 5.3   | -0.56               | $1.7 \times 10^{-3}$    |
| RCO         | $\log k_u$            | Full (108)       | 0.65                            | -1.6  | 0.01                | $9.3 \times 10^{-1}$ NS |
|             |                       | Two-State (73)   | -9.2                            | 0.36  | -0.12               | $3.1 \times 10^{-1}$ NS |
|             |                       | Multi-State (35) | -1.9                            | -2.3  | -0.02               | $9.0 \times 10^{-1}$ NS |
|             |                       | Alpha (33)       | 51                              | -4.7  | 0.52                | $2.0 \times 10^{-3}$    |
|             |                       | Beta (34)        | 39                              | -8.1  | 0.46                | $6.4 \times 10^{-3}$    |
|             |                       | Mixed (41)       | 7.9                             | -4.1  | 0.14                | $3.8 \times 10^{-1}$ NS |
|             |                       | Maxwell (28)     | -14                             | 0.3   | -0.26               | $1.7 \times 10^{-1}$ NS |
| RCO         | $\log k_f = \log k_u$ | Full (108)       | -2.2                            | 0.024 | -0.04               | $7.0 \times 10^{-1}$ NS |
|             |                       | Two-State (73)   | -12                             | 1.8   | -0.17               | $1.4 \times 10^{-1}$ NS |
|             |                       | Multi-State (35) | -2.1                            | -0.87 | -0.04               | $8.1 \times 10^{-1}$ NS |
|             |                       | Alpha (33)       | 42                              | -2.8  | 0.48                | $4.6 \times 10^{-3}$    |
|             |                       | Beta (34)        | 29                              | -5.5  | 0.38                | $2.7 \times 10^{-2}$    |
|             |                       | Mixed (41)       | 4.8                             | -2.0  | 0.14                | $4.0 \times 10^{-1}$ NS |
|             |                       | Maxwell (28)     | -14                             | 1.7   | -0.39               | $3.9 \times 10^{-2}$    |
| TCD         | $\log k_f$            | Full (108)       | -2.8                            | 4.8   | -0.37               | $7.5 \times 10^{-5}$    |
|             |                       | Two-State (73)   | -5.0                            | 7.6   | -0.65               | $5.6 \times 10^{-10}$   |
|             |                       | Multi-State (35) | -1.4                            | 2.4   | -0.21               | $2.3 \times 10^{-1}$ NS |
|             |                       | Alpha (33)       | 2.0                             | 2.0   | 0.19                | $2.9 \times 10^{-1}$ NS |
|             |                       | Beta (34)        | -3.9                            | 5.8   | -0.42               | $1.2 \times 10^{-2}$    |
|             |                       | Mixed (41)       | 0.99                            | 0.085 | 0.14                | $3.9 \times 10^{-1}$ NS |
|             |                       | Maxwell (28)     | -3.6                            | 6.4   | -0.60               | $6.5 \times 10^{-4}$    |

|            |                      |                  |       |       |       |                         |
|------------|----------------------|------------------|-------|-------|-------|-------------------------|
| TCD        | log $k_u$            | Full (108)       | -4.1  | 2.6   | -0.35 | $2.4 \times 10^{-4}$    |
|            |                      | Two-State (73)   | -6.7  | 6.0   | -0.55 | $6.1 \times 10^{-7}$    |
|            |                      | Multi-State (35) | -2.3  | -0.47 | -0.20 | $2.4 \times 10^{-1}$ NS |
|            |                      | Alpha (33)       | 1.4   | -0.39 | 0.07  | $6.9 \times 10^{-1}$ NS |
|            |                      | Beta (34)        | -2.3  | 0.82  | -0.15 | $3.8 \times 10^{-1}$ NS |
|            |                      | Mixed (41)       | -0.23 | -2.8  | -0.03 | $8.7 \times 10^{-1}$ NS |
|            |                      | Maxwell (28)     | -3.8  | 2.5   | -0.42 | $2.5 \times 10^{-2}$    |
| TCD        | log $k_f = \log k_u$ | Full (108)       | -3.9  | 3.6   | -0.40 | $1.6 \times 10^{-5}$    |
|            |                      | Two-State (73)   | -6.4  | 6.8   | -0.59 | $4.2 \times 10^{-8}$    |
|            |                      | Multi-State (35) | -1.7  | 0.43  | -0.24 | $1.6 \times 10^{-1}$ NS |
|            |                      | Alpha (33)       | 0.037 | 1.5   | 0.00  | $1.0 \times 10^0$ NS    |
|            |                      | Beta (34)        | -3.8  | 3.4   | -0.28 | $1.0 \times 10^{-1}$ NS |
|            |                      | Mixed (41)       | -0.17 | -1.1  | -0.03 | $8.5 \times 10^{-1}$ NS |
|            |                      | Maxwell (28)     | -3.5  | 3.4   | -0.55 | $2.7 \times 10^{-3}$    |
| SRO        | log $k_f$            | Full (108)       | 0.55  | -1.7  | 0.35  | $2.1 \times 10^{-4}$    |
|            |                      | Two-State (73)   | 0.66  | -1.9  | 0.44  | $8.3 \times 10^{-5}$    |
|            |                      | Multi-State (35) | 0.62  | -3.2  | 0.40  | $1.7 \times 10^{-2}$    |
|            |                      | Alpha (33)       | -0.85 | 10.   | -0.37 | $3.4 \times 10^{-2}$    |
|            |                      | Beta (34)        | -0.38 | 3.6   | -0.08 | $6.6 \times 10^{-1}$ NS |
|            |                      | Mixed (41)       | -0.33 | 3.3   | -0.11 | $5.0 \times 10^{-1}$ NS |
|            |                      | Maxwell (28)     | 0.59  | -1.6  | 0.50  | $7.4 \times 10^{-3}$    |
| SRO        | log $k_u$            | Full (108)       | 0.68  | -6.0  | 0.27  | $4.0 \times 10^{-3}$    |
|            |                      | Two-State (73)   | 0.68  | -5.5  | 0.28  | $1.5 \times 10^{-2}$    |
|            |                      | Multi-State (35) | 1.1   | -10.  | 0.43  | $9.1 \times 10^{-3}$    |
|            |                      | Alpha (33)       | -2.5  | 21    | -0.57 | $5.7 \times 10^{-3}$    |
|            |                      | Beta (34)        | -2.1  | 9.8   | -0.26 | $1.4 \times 10^{-1}$ NS |
|            |                      | Mixed (41)       | 0.83  | -8.4  | 0.22  | $1.7 \times 10^{-1}$ NS |
|            |                      | Maxwell (28)     | 0.71  | -6.5  | 0.40  | $3.6 \times 10^{-2}$    |
| SRO        | log $k_f = \log k_u$ | Full (108)       | 0.63  | -4.5  | 0.31  | $1.0 \times 10^{-3}$    |
|            |                      | Two-State (73)   | 0.73  | -4.7  | 0.35  | $2.6 \times 10^{-3}$    |
|            |                      | Multi-State (35) | 0.67  | -5.8  | 0.43  | $1.0 \times 10^{-2}$    |
|            |                      | Alpha (33)       | -2.0  | 18    | -0.53 | $1.5 \times 10^{-3}$    |
|            |                      | Beta (34)        | -1.9  | 9.5   | -0.26 | $1.4 \times 10^{-1}$ NS |
|            |                      | Mixed (41)       | 0.56  | -4.9  | 0.23  | $1.4 \times 10^{-1}$ NS |
|            |                      | Maxwell (28)     | 0.63  | -4.7  | 0.49  | $8.0 \times 10^{-3}$    |
| NonLocalCO | log $k_f$            | Full (108)       | -0.17 | 5.2   | -0.59 | $1.1 \times 10^{-11}$   |
|            |                      | Two-State (73)   | -0.13 | 4.8   | -0.46 | $4.3 \times 10^{-5}$    |
|            |                      | Multi-State (35) | -0.19 | 5.3   | -0.74 | $3.6 \times 10^{-7}$    |
|            |                      | Alpha (33)       | -0.11 | 5.4   | -0.58 | $4.5 \times 10^{-4}$    |
|            |                      | Beta (34)        | -0.27 | 6.2   | -0.77 | $7.7 \times 10^{-8}$    |
|            |                      | Mixed (41)       | -0.14 | 4.4   | -0.53 | $3.3 \times 10^{-4}$    |
|            |                      | Maxwell (28)     | -0.03 | 2.9   | -0.14 | $4.7 \times 10^{-1}$ NS |
| NonLocalCO | log $k_u$            | Full (108)       | -0.31 | 4.5   | -0.71 | $7.1 \times 10^{-18}$   |
|            |                      | Two-State (73)   | -0.32 | 4.7   | -0.69 | $2.0 \times 10^{-11}$   |
|            |                      | Multi-State (35) | -0.28 | 3.9   | -0.70 | $3.5 \times 10^{-6}$    |
|            |                      | Alpha (33)       | -0.27 | 5.3   | -0.74 | $6.6 \times 10^{-7}$    |
|            |                      | Beta (34)        | -0.45 | 6.0   | -0.79 | $3.6 \times 10^{-8}$    |
|            |                      | Mixed (41)       | -0.22 | 2.0   | -0.65 | $3.4 \times 10^{-6}$    |
|            |                      | Maxwell (28)     | -0.14 | 0.98  | -0.45 | $1.6 \times 10^{-2}$    |

|            |                       |                  |         |        |       |                         |
|------------|-----------------------|------------------|---------|--------|-------|-------------------------|
| NonLocalCO | $\log k_f = \log k_u$ | Full (108)       | -0.23   | 4.3    | -0.65 | $1.5 \times 10^{-14}$   |
|            |                       | Two-State (73)   | -0.25   | 4.7    | -0.62 | $4.5 \times 10^{-9}$    |
|            |                       | Multi-State (35) | -0.18   | 3.0    | -0.70 | $2.3 \times 10^{-6}$    |
|            |                       | Alpha (33)       | -0.22   | 5.4    | -0.70 | $5.0 \times 10^{-6}$    |
|            |                       | Beta (34)        | -0.42   | 6.4    | -0.81 | $5.3 \times 10^{-9}$    |
|            |                       | Mixed (41)       | -0.12   | 1.5    | -0.59 | $5.1 \times 10^{-5}$    |
|            |                       | Maxwell (28)     | -0.085  | 1.2    | -0.38 | $4.6 \times 10^{-2}$    |
| LocalCO    | $\log k_f$            | Full (108)       | 0.28    | 0.96   | 0.56  | $4.5 \times 10^{-10}$   |
|            |                       | Two-State (73)   | 0.24    | 1.5    | 0.57  | $1.7 \times 10^{-7}$    |
|            |                       | Multi-State (35) | 0.58    | -0.70  | 0.60  | $1.4 \times 10^{-4}$    |
|            |                       | Alpha (33)       | 0.12    | 2.6    | 0.44  | $1.1 \times 10^{-2}$    |
|            |                       | Beta (34)        | 0.74    | -0.077 | 0.66  | $2.5 \times 10^{-5}$    |
|            |                       | Mixed (41)       | 0.58    | -0.12  | 0.28  | $8.1 \times 10^{-2}$ NS |
|            |                       | Maxwell (28)     | 0.50    | 0.91   | 0.62  | $4.5 \times 10^{-4}$    |
| LocalCO    | $\log k_u$            | Full (108)       | 0.47    | -3.3   | 0.60  | $4.9 \times 10^{-12}$   |
|            |                       | Two-State (73)   | 0.43    | -2.7   | 0.64  | $1.6 \times 10^{-9}$    |
|            |                       | Multi-State (35) | 0.84    | -5.1   | 0.54  | $8.8 \times 10^{-4}$    |
|            |                       | Alpha (33)       | 0.27    | -1.3   | 0.54  | $1.3 \times 10^{-3}$    |
|            |                       | Beta (34)        | 1.2     | -4.5   | 0.66  | $2.1 \times 10^{-5}$    |
|            |                       | Mixed (41)       | 0.99    | -5.2   | 0.38  | $1.5 \times 10^{-2}$    |
|            |                       | Maxwell (28)     | 0.78    | -3.9   | 0.63  | $2.9 \times 10^{-3}$    |
| LocalCO    | $\log k_f = \log k_u$ | Full (108)       | 0.42    | -1.8   | 0.65  | $4.3 \times 10^{-14}$   |
|            |                       | Two-State (73)   | 0.39    | -1.5   | 0.65  | $6.0 \times 10^{-10}$   |
|            |                       | Multi-State (35) | 0.63    | -3.0   | 0.64  | $3.9 \times 10^{-5}$    |
|            |                       | Alpha (33)       | 0.26    | -0.32  | 0.57  | $4.7 \times 10^{-4}$    |
|            |                       | Beta (34)        | 1.1     | -3.3   | 0.68  | $8.3 \times 10^{-6}$    |
|            |                       | Mixed (41)       | 0.72    | -2.9   | 0.43  | $4.5 \times 10^{-3}$    |
|            |                       | Maxwell (28)     | 0.62    | -2.2   | 0.71  | $2.4 \times 10^{-5}$    |
| N $\alpha$ | $\log k_f$            | Full (108)       | -0.048  | 4.3    | -0.64 | $7.3 \times 10^{-14}$   |
|            |                       | Two-State (73)   | -0.042  | 4.1    | -0.47 | $2.4 \times 10^{-5}$    |
|            |                       | Multi-State (35) | -0.050  | 4.3    | -0.80 | $9.0 \times 10^{-9}$    |
|            |                       | Alpha (33)       | -0.037  | 5.0    | -0.72 | $2.2 \times 10^{-6}$    |
|            |                       | Beta (34)        | -0.076  | 4.6    | -0.72 | $1.8 \times 10^{-6}$    |
|            |                       | Mixed (41)       | -0.041  | 3.6    | -0.66 | $3.3 \times 10^{-6}$    |
|            |                       | Maxwell (28)     | -0.0089 | 2.7    | -0.17 | $3.9 \times 10^{-1}$ NS |
| N $\alpha$ | $\log k_u$            | Full (108)       | -0.078  | 2.2    | -0.68 | $8.4 \times 10^{-16}$   |
|            |                       | Two-State (73)   | -0.094  | 2.7    | -0.65 | $3.3 \times 10^{-10}$   |
|            |                       | Multi-State (35) | -0.070  | 2.0    | -0.69 | $5.6 \times 10^{-6}$    |
|            |                       | Alpha (33)       | -0.070  | 3.5    | -0.72 | $1.8 \times 10^{-6}$    |
|            |                       | Beta (34)        | -0.15   | 4.1    | -0.84 | $4.1 \times 10^{-10}$   |
|            |                       | Mixed (41)       | -0.047  | -0.26  | -0.60 | $3.5 \times 10^{-5}$    |
|            |                       | Maxwell (28)     | -0.031  | -0.46  | -0.39 | $4.0 \times 10^{-2}$    |
| N $\alpha$ | $\log k_f = \log k_u$ | Full (108)       | -0.060  | 2.6    | -0.63 | $1.8 \times 10^{-13}$   |
|            |                       | Two-State (73)   | -0.077  | 3.1    | -0.61 | $1.1 \times 10^{-8}$    |
|            |                       | Multi-State (35) | -0.046  | 1.8    | -0.71 | $1.9 \times 10^{-6}$    |
|            |                       | Alpha (33)       | -0.060  | 4.0    | -0.71 | $3.3 \times 10^{-6}$    |
|            |                       | Beta (34)        | -0.13   | 4.5    | -0.84 | $4.2 \times 10^{-10}$   |
|            |                       | Mixed (41)       | -0.029  | 0.39   | -0.58 | $6.1 \times 10^{-5}$    |
|            |                       | Maxwell (28)     | -0.020  | 0.33   | -0.35 | $6.7 \times 10^{-2}$ NS |

|    |                      |                  |         |       |       |                         |
|----|----------------------|------------------|---------|-------|-------|-------------------------|
| CC | log $k_f$            | Full (108)       | 32      | -16   | 0.69  | $1.7 \times 10^{-16}$   |
|    |                      | Two-State (73)   | 27      | -13   | 0.61  | $9.5 \times 10^{-9}$    |
|    |                      | Multi-State (35) | 59      | -32   | 0.83  | $9.9 \times 10^{-10}$   |
|    |                      | Alpha (33)       | 25      | -11   | 0.73  | $1.2 \times 10^{-6}$    |
|    |                      | Beta (34)        | 28      | -15   | 0.73  | $1.2 \times 10^{-6}$    |
|    |                      | Mixed (41)       | 31      | -16   | 0.51  | $5.9 \times 10^{-4}$    |
|    |                      | Maxwell (28)     | 2.8     | 0.69  | 0.05  | $7.9 \times 10^{-1}$ NS |
| CC | log $k_u$            | Full (108)       | 57      | -34   | 0.78  | $3.3 \times 10^{-23}$   |
|    |                      | Two-State (73)   | 56      | -34   | 0.80  | $2.4 \times 10^{-17}$   |
|    |                      | Multi-State (35) | 83      | -48   | 0.71  | $1.6 \times 10^{-6}$    |
|    |                      | Alpha (33)       | 49      | -28   | 0.75  | $5.2 \times 10^{-7}$    |
|    |                      | Beta (34)        | 53      | -32   | 0.83  | $1.1 \times 10^{-9}$    |
|    |                      | Mixed (41)       | 44      | -28   | 0.58  | $6.9 \times 10^{-5}$    |
|    |                      | Maxwell (28)     | 38      | -23   | 0.48  | $9.9 \times 10^{-3}$    |
| CC | log $k_f = \log k_u$ | Full (108)       | 47      | -27   | 0.78  | $2.4 \times 10^{-23}$   |
|    |                      | Two-State (73)   | 48      | -28   | 0.77  | $2.5 \times 10^{-15}$   |
|    |                      | Multi-State (35) | 57      | -33   | 0.79  | $2.0 \times 10^{-8}$    |
|    |                      | Alpha (33)       | 45      | -25   | 0.78  | $7.1 \times 10^{-8}$    |
|    |                      | Beta (34)        | 47      | -28   | 0.83  | $1.0 \times 10^{-9}$    |
|    |                      | Mixed (41)       | 26      | -16   | 0.54  | $2.9 \times 10^{-4}$    |
|    |                      | Maxwell (28)     | 18      | -11   | 0.32  | $9.4 \times 10^{-2}$ NS |
| L  | log $k_f$            | Full (108)       | -0.024  | 4.3   | -0.64 | $1.2 \times 10^{-13}$   |
|    |                      | Two-State (73)   | -0.021  | 4.1   | -0.46 | $3.5 \times 10^{-5}$    |
|    |                      | Multi-State (35) | -0.025  | 4.4   | -0.80 | $7.6 \times 10^{-9}$    |
|    |                      | Alpha (33)       | -0.018  | 5.0   | -0.72 | $2.8 \times 10^{-6}$    |
|    |                      | Beta (34)        | -0.037  | 4.6   | -0.70 | $3.4 \times 10^{-6}$    |
|    |                      | Mixed (41)       | -0.020  | 3.6   | -0.64 | $6.4 \times 10^{-6}$    |
|    |                      | Maxwell (28)     | -0.0040 | 2.6   | -0.16 | $4.3 \times 10^{-1}$ NS |
| L  | log $k_u$            | Full (108)       | -0.093  | 2.3   | -0.68 | $6.7 \times 10^{-16}$   |
|    |                      | Two-State (73)   | -0.046  | 2.7   | -0.65 | $4.2 \times 10^{-10}$   |
|    |                      | Multi-State (35) | -0.036  | 2.2   | -0.69 | $3.6 \times 10^{-6}$    |
|    |                      | Alpha (33)       | -0.035  | 3.6   | -0.72 | $2.4 \times 10^{-6}$    |
|    |                      | Beta (34)        | -0.073  | 4.3   | -0.84 | $6.2 \times 10^{-10}$   |
|    |                      | Mixed (41)       | -0.023  | -0.21 | -0.60 | $3.5 \times 10^{-5}$    |
|    |                      | Maxwell (28)     | -0.015  | -0.44 | -0.39 | $3.8 \times 10^{-2}$    |
| L  | log $k_f = \log k_u$ | Full (108)       | -0.030  | 2.6   | -0.64 | $1.5 \times 10^{-13}$   |
|    |                      | Two-State (73)   | -0.038  | 3.2   | -0.61 | $1.2 \times 10^{-8}$    |
|    |                      | Multi-State (35) | -0.023  | 1.9   | -0.71 | $1.5 \times 10^{-6}$    |
|    |                      | Alpha (33)       | -0.030  | 4.0   | -0.71 | $3.8 \times 10^{-6}$    |
|    |                      | Beta (34)        | -0.065  | 4.6   | -0.83 | $9.7 \times 10^{-10}$   |
|    |                      | Mixed (41)       | -0.014  | 0.43  | -0.58 | $6.4 \times 10^{-5}$    |
|    |                      | Maxwell (28)     | -0.0098 | 0.34  | -0.35 | $6.5 \times 10^{-2}$ NS |
| L  | $\Delta G_{F-U}$     | Full (108)       | -0.021  | -2.7  | -0.42 | $4.6 \times 10^{-6}$    |
|    |                      | Two-State (73)   | -0.035  | -1.9  | -0.57 | $1.2 \times 10^{-7}$    |
|    |                      | Multi-State (35) | -0.014  | -3.0  | -0.29 | $9.5 \times 10^{-2}$ NS |
|    |                      | Alpha (33)       | -0.023  | -2.0  | -0.54 | $1.2 \times 10^{-3}$    |
|    |                      | Beta (34)        | -0.049  | -0.42 | -0.68 | $1.1 \times 10^{-5}$    |
|    |                      | Mixed (41)       | -0.0047 | -5.1  | -0.10 | $5.5 \times 10^{-1}$ NS |
|    |                      | Maxwell (28)     | -0.015  | -4.2  | -0.31 | $1.1 \times 10^{-1}$ NS |

|                    |                                         |                  |        |       |       |                         |
|--------------------|-----------------------------------------|------------------|--------|-------|-------|-------------------------|
| L <sup>(2/3)</sup> | log k <sub>f</sub>                      | Full (108)       | -0.18  | 5.7   | -0.67 | 4.1x10 <sup>-15</sup>   |
|                    |                                         | Two-State (73)   | -0.16  | 5.3   | -0.51 | 3.5x10 <sup>-6</sup>    |
|                    |                                         | Multi-State (35) | -0.20  | 6.2   | -0.81 | 3.0x10 <sup>-9</sup>    |
|                    |                                         | Alpha (33)       | -0.14  | 6.0   | -0.75 | 6.4x10 <sup>-7</sup>    |
|                    |                                         | Beta (34)        | -0.24  | 6.1   | -0.72 | 1.4x10 <sup>-6</sup>    |
|                    |                                         | Mixed (41)       | -0.15  | 4.8   | -0.64 | 6.8x10 <sup>-6</sup>    |
|                    |                                         | Maxwell (28)     | -0.028 | 2.8   | -0.14 | 4.9x10 <sup>-1</sup> NS |
| L <sup>(2/3)</sup> | log k <sub>u</sub>                      | Full (108)       | -0.30  | 4.7   | -0.72 | 1.3x10 <sup>-18</sup>   |
|                    |                                         | Two-State (73)   | -0.36  | 5.5   | -0.72 | 8.3x10 <sup>-13</sup>   |
|                    |                                         | Multi-State (35) | -0.28  | 4.7   | -0.71 | 2.1x10 <sup>-6</sup>    |
|                    |                                         | Alpha (33)       | -0.27  | 5.7   | -0.77 | 2.0x10 <sup>-7</sup>    |
|                    |                                         | Beta (34)        | -0.48  | 7.1   | -0.86 | 1.0x10 <sup>-10</sup>   |
|                    |                                         | Mixed (41)       | -0.18  | 1.3   | -0.60 | 3.4x10 <sup>-5</sup>    |
|                    |                                         | Maxwell (28)     | -0.13  | 0.74  | -0.42 | 2.6x10 <sup>-2</sup>    |
| L <sup>(2/3)</sup> | log k <sub>f</sub> = log k <sub>u</sub> | Full (108)       | -0.24  | 4.6   | -0.69 | 2.6x10 <sup>-16</sup>   |
|                    |                                         | Two-State (73)   | -0.30  | 5.5   | -0.68 | 5.5x10 <sup>-11</sup>   |
|                    |                                         | Multi-State (35) | -0.19  | 3.6   | -0.74 | 4.8x10 <sup>-7</sup>    |
|                    |                                         | Alpha (33)       | -0.24  | 5.9   | -0.76 | 2.3x10 <sup>-7</sup>    |
|                    |                                         | Beta (34)        | -0.42  | 7.1   | -0.85 | 1.7x10 <sup>-10</sup>   |
|                    |                                         | Mixed (41)       | -0.11  | 1.4   | -0.59 | 5.5x10 <sup>-5</sup>    |
|                    |                                         | Maxwell (28)     | -0.081 | 1.0   | -0.37 | 5.5x10 <sup>-2</sup> NS |
| L <sup>(2/3)</sup> | ΔG <sub>F-U</sub>                       | Full (108)       | -0.17  | -1.3  | -0.46 | 4.2x10 <sup>-7</sup>    |
|                    |                                         | Two-State (73)   | -0.27  | 0.23  | -0.63 | 2.4x10 <sup>-9</sup>    |
|                    |                                         | Multi-State (35) | -0.11  | -2.0  | -0.29 | 8.8x10 <sup>-2</sup> NS |
|                    |                                         | Alpha (33)       | -0.18  | -0.53 | -0.59 | 3.2x10 <sup>-4</sup>    |
|                    |                                         | Beta (34)        | -0.32  | 1.4   | -0.69 | 6.2x10 <sup>-6</sup>    |
|                    |                                         | Mixed (41)       | -0.037 | -4.8  | -0.10 | 5.4x10 <sup>-1</sup> NS |
|                    |                                         | Maxwell (28)     | -0.14  | -2.8  | -0.35 | 6.5x10 <sup>-2</sup> NS |
| L <sup>(1/2)</sup> | log k <sub>f</sub>                      | Full (108)       | -0.52  | 7.0   | -0.68 | 1.1x10 <sup>-15</sup>   |
|                    |                                         | Two-State (73)   | -0.46  | 6.5   | -0.53 | 1.2x10 <sup>-6</sup>    |
|                    |                                         | Multi-State (35) | -0.61  | 7.9   | -0.82 | 2.1x10 <sup>-9</sup>    |
|                    |                                         | Alpha (33)       | -0.40  | 7.0   | -0.75 | 3.9x10 <sup>-7</sup>    |
|                    |                                         | Beta (34)        | -0.66  | 7.5   | -0.73 | 9.9x10 <sup>-7</sup>    |
|                    |                                         | Mixed (41)       | -0.46  | 6.1   | -0.64 | 7.5x10 <sup>-6</sup>    |
|                    |                                         | Maxwell (28)     | -0.077 | 3.0   | -0.12 | 5.3x10 <sup>-1</sup> NS |
| L <sup>(1/2)</sup> | log k <sub>u</sub>                      | Full (108)       | -0.89  | 7.0   | -0.74 | 6.0x10 <sup>-20</sup>   |
|                    |                                         | Two-State (73)   | -1.0   | 8.1   | -0.75 | 4.1x10 <sup>-14</sup>   |
|                    |                                         | Multi-State (35) | -0.86  | 7.2   | -0.71 | 1.7x10 <sup>-6</sup>    |
|                    |                                         | Alpha (33)       | -0.80  | 7.7   | -0.79 | 6.3x10 <sup>-8</sup>    |
|                    |                                         | Beta (34)        | -1.3   | 9.8   | -0.86 | 4.7x10 <sup>-11</sup>   |
|                    |                                         | Mixed (41)       | -0.54  | 2.8   | -0.60 | 3.5x10 <sup>-5</sup>    |
|                    |                                         | Maxwell (28)     | -0.40  | 1.9   | -0.43 | 2.1x10 <sup>-2</sup>    |
| L <sup>(1/2)</sup> | log k <sub>f</sub> = log k <sub>u</sub> | Full (108)       | -0.70  | 6.4   | -0.71 | 9.2x10 <sup>-18</sup>   |
|                    |                                         | Two-State (73)   | -0.87  | 7.7   | -0.70 | 3.9x10 <sup>-12</sup>   |
|                    |                                         | Multi-State (35) | -0.57  | 5.3   | -0.75 | 2.8x10 <sup>-7</sup>    |
|                    |                                         | Alpha (33)       | -0.70  | 7.7   | -0.79 | 5.7x10 <sup>-8</sup>    |
|                    |                                         | Beta (34)        | -1.2   | 9.5   | -0.86 | 7.8x10 <sup>-11</sup>   |
|                    |                                         | Mixed (41)       | -0.34  | 2.3   | -0.59 | 5.3x10 <sup>-5</sup>    |
|                    |                                         | Maxwell (28)     | -0.25  | 1.8   | -0.37 | 5.1x10 <sup>-1</sup> NS |

|                    |                                         |                  |       |       |       |                         |
|--------------------|-----------------------------------------|------------------|-------|-------|-------|-------------------------|
| L <sup>(1/2)</sup> | $\Delta G_{F-U}$                        | Full (108)       | -0.50 | 0.054 | -0.48 | 1.2x10 <sup>-7</sup>    |
|                    |                                         | Two-State (73)   | -0.79 | 2.2   | -0.65 | 4.1x10 <sup>-10</sup>   |
|                    |                                         | Multi-State (35) | -0.34 | -1.0  | -0.30 | 8.5x10 <sup>-2</sup> NS |
|                    |                                         | Alpha (33)       | -0.54 | 0.87  | -0.61 | 1.7x10 <sup>-4</sup>    |
|                    |                                         | Beta (34)        | -0.87 | 3.2   | -0.69 | 5.2x10 <sup>-6</sup>    |
|                    |                                         | Mixed (41)       | -0.11 | -4.5  | -0.10 | 5.4x10 <sup>-1</sup> NS |
|                    |                                         | Maxwell (28)     | -0.44 | -1.4  | -0.37 | 5.0x10 <sup>-2</sup> NS |
| log L              | log k <sub>f</sub>                      | Full (108)       | -5.7  | 13    | -0.69 | 2.0x10 <sup>-16</sup>   |
|                    |                                         | Two-State (73)   | -4.9  | 12    | -0.57 | 1.4x10 <sup>-7</sup>    |
|                    |                                         | Multi-State (35) | -8.0  | 18    | -0.82 | 1.4x10 <sup>-9</sup>    |
|                    |                                         | Alpha (33)       | -4.3  | 11    | -0.75 | 4.3x10 <sup>-7</sup>    |
|                    |                                         | Beta (34)        | -6.2  | 13    | -0.74 | 5.5x10 <sup>-7</sup>    |
|                    |                                         | Mixed (41)       | -5.7  | 13    | -0.63 | 1.2x10 <sup>-5</sup>    |
|                    |                                         | Maxwell (28)     | -0.69 | 3.6   | -0.09 | 6.6x10 <sup>-1</sup> NS |
| log L              | log k <sub>u</sub>                      | Full (108)       | -10   | 18    | -0.78 | 6.5x10 <sup>-23</sup>   |
|                    |                                         | Two-State (73)   | -11   | 20    | -0.79 | 6.2x10 <sup>-17</sup>   |
|                    |                                         | Multi-State (35) | -11   | 21    | -0.72 | 1.1x10 <sup>-6</sup>    |
|                    |                                         | Alpha (33)       | -8.7  | 17    | -0.81 | 9.4x10 <sup>-9</sup>    |
|                    |                                         | Beta (34)        | -12   | 21    | -0.87 | 2.1x10 <sup>-11</sup>   |
|                    |                                         | Mixed (41)       | -6.8  | 11    | -0.60 | 4.0x10 <sup>-5</sup>    |
|                    |                                         | Maxwell (28)     | -5.4  | 8.6   | -0.46 | 1.4x10 <sup>-2</sup>    |
| log L              | log k <sub>f</sub> = log k <sub>u</sub> | Full (108)       | -8.1  | 15    | -0.76 | 1.4x10 <sup>-21</sup>   |
|                    |                                         | Two-State (73)   | -9.3  | 17    | -0.76 | 9.5x10 <sup>-15</sup>   |
|                    |                                         | Multi-State (35) | -7.6  | 15    | -0.77 | 5.9x10 <sup>-8</sup>    |
|                    |                                         | Alpha (33)       | -7.8  | 16    | -0.83 | 3.1x10 <sup>-9</sup>    |
|                    |                                         | Beta (34)        | -11   | 19    | -0.87 | 3.2x10 <sup>-11</sup>   |
|                    |                                         | Mixed (41)       | -4.3  | 7.4   | -0.59 | 4.9x10 <sup>-5</sup>    |
|                    |                                         | Maxwell (28)     | -3.2  | 5.6   | -0.38 | 4.8x10 <sup>-2</sup>    |
| log L              | $\Delta G_{F-U}$                        | Full (108)       | -5.9  | 6.7   | -0.53 | 4.8x10 <sup>-9</sup>    |
|                    |                                         | Two-State (73)   | -8.3  | 11    | -0.69 | 1.4x10 <sup>-11</sup>   |
|                    |                                         | Multi-State (35) | -4.6  | 4.6   | -0.30 | 7.6x10 <sup>-2</sup> NS |
|                    |                                         | Alpha (33)       | -6.1  | 7.5   | -0.65 | 3.7x10 <sup>-5</sup>    |
|                    |                                         | Beta (34)        | -8.0  | 11    | -0.70 | 5.0x10 <sup>-6</sup>    |
|                    |                                         | Mixed (41)       | -1.5  | -2.6  | -0.11 | 5.1x10 <sup>-1</sup> NS |
|                    |                                         | Maxwell (28)     | -6.4  | 6.8   | -0.43 | 2.4x10 <sup>-2</sup>    |

Individual correlations and linear fits are shown for subsets of the data as in Fig. 1. Additionally, values for the commonly used dataset of Maxwell et al. are shown for comparison.

<sup>a</sup> two-tailed probability value.

<sup>NS</sup> Correlation is not significant at the 0.05 level ( $5.0 \times 10^{-2}$ ).

$\Delta G_{F-U} = G_F - G_U = -RT \ln ( k_f / k_u )$ , where R is the gas constant and T is the absolute temperature in Kelvin, gives the Gibbs free energy of the folded state relative to the unfolded state.

$\log k_f = \log k_u$  where the thermodynamic stability of the protein is zero, is used to correct for the possible effects of differing stabilities.

Relative Contact Order (RCO) is calculated as by Plaxco et al. [1].

Absolute Contact Order (ACO) is calculated as by Ivankov et al. [2].

Long Range Order (LRO) is calculated as by Gromiha et al. [3].

Short Range Order (SRO), local contact order (LocalCO), and non-local contact order (NonLocalCO) are calculated as by Zou and Ozkan [4].

Total Contact Distance (TCD) is calculated as by Zhou and Zhou [5].

Clustering Coefficient (CC) is calculated as by Micheletti [6].

$N_{\alpha}$  was calculated as by Ouyang and Liang [7].

In the case of all of the above parameters the original equations and cutoffs were used, except for definitions of contact, which were all made consistent with ACO by counting a contact between residues when any heavy atoms had a distance  $< 6.0 \text{ \AA}$ .

Various dependencies on length were suggested by various works [8-13].



**Table SII. Dataset**

| Protein Name                                                          | PDB (residues) | Kinetic State | Class    | PDB Length | $\log k_f = \log k_u^a$ | $\log k_f$ ( $s^{-1}$ ) <sup>a</sup> | $\log k_u$ ( $s^{-1}$ ) <sup>a</sup> | $\Delta G_{F-U}$ (kcal/mol) | Source |
|-----------------------------------------------------------------------|----------------|---------------|----------|------------|-------------------------|--------------------------------------|--------------------------------------|-----------------------------|--------|
| Colicin E7 immunity protein                                           | 1AYI           | Two           | $\alpha$ | 85         | 1.22                    | 3.13                                 | 1.00                                 | -2.90                       | [14]   |
| Telomeric protein DNA-binding domain, human                           | 1BA5           | Two           | $\alpha$ | 49         | 0.69                    | 2.56                                 | 0.52                                 | -2.78                       | [15]   |
| Immunoglobulin binding B-domain                                       | 1BDD (2-59)    | Two           | $\alpha$ | 58         | 2.52                    | 5.08                                 | 1.82                                 | -4.44                       | [15]   |
| 16th domain of brain $\alpha$ -spectrin                               | 1CUN (7-112)   | Two           | $\alpha$ | 106        | -0.87                   | 2.08                                 | -2.61                                | -6.40                       | [15]   |
| 17th domain of brain $\alpha$ -spectrin                               | 1CUN (113-219) | Two           | $\alpha$ | 107        | -1.48                   | 1.48                                 | -3.39                                | -6.64                       | [15]   |
| FADD death-domain, human                                              | 1E41 (93-192)  | Two           | $\alpha$ | 100        | -0.26                   | 2.95                                 | -1.30                                | -5.81                       | [15]   |
| Rap1 myb-domain, human                                                | 1FEX           | Two           | $\alpha$ | 59         | 1.69                    | 3.56                                 | 1.26                                 | -3.14                       | [15]   |
| Myb transforming protein                                              | 1IDY           | Two           | $\alpha$ | 54         | 1.35                    | 3.78                                 | 0.74                                 | -4.15                       | [15]   |
| Colicin E9 immunity protein                                           | 1IMQ           | Two           | $\alpha$ | 85         | -0.61                   | 3.17                                 | -0.83                                | -5.45                       | [14]   |
| Trp-Cage Miniprotein                                                  | 1L2Y           | Two           | $\alpha$ | 20         | 5.65                    | 5.43                                 | 4.99                                 | -0.59                       | [15]   |
| Lyme disease variable surface antigen                                 | 1L8W (29-335)  | Two           | $\alpha$ | 307        | -2.04                   | 0.88                                 | -3.68                                | -6.22                       | [14]   |
| Lambda repressor                                                      | 1LMB           | Two           | $\alpha$ | 80         | 2.26                    | 4.52                                 | 1.39                                 | -4.27                       | [14]   |
| Acyl-coenzyme A binding protein, cow                                  | 1NTI           | Two           | $\alpha$ | 86         | -0.13                   | 3.04                                 | -1.69                                | -6.46                       | [14]   |
| Protein yjbJ                                                          | 1RYK           | Two           | $\alpha$ | 69         | 2.78                    | 3.95                                 | 1.95                                 | -2.73                       | [14]   |
| BBA5 mini-protein                                                     | 1T8J           | Two           | $\alpha$ | 23         | 5.43                    | 5.12                                 | 5.73                                 | 0.83                        | [15]   |
| 15th domain of brain alpha-spectrin                                   | 1U5P           | Two           | $\alpha$ | 110        | 1.74                    | 4.78                                 | 0.13                                 | -6.34                       | [15]   |
| Villin Headpiece                                                      | 1VII           | Two           | $\alpha$ | 36         | 4.60                    | 4.08                                 | 2.30                                 | -2.43                       | [16]   |
| Dihydrolipolysine acetyltransferase, <i>G. stearothermophilus</i>     | 1W4G           | Two           | $\alpha$ | 45         | 2.52                    | 4.44                                 | 1.30                                 | -4.28                       | [17]   |
| Dihydrolipolysine succinyltransferase, <i>E. coli</i>                 | 1W4H           | Two           | $\alpha$ | 45         | 4.00                    | 5.11                                 | 3.78                                 | -1.82                       | [17]   |
| Pyruvate dehydrogenase E2, <i>P. aerophilum</i>                       | 1W4J           | Two           | $\alpha$ | 51         | 3.26                    | 5.32                                 | 2.74                                 | -3.52                       | [17]   |
| <i>de novo</i> designed 3-helix bundle                                | 2A3D           | Two           | $\alpha$ | 73         | 5.39                    | 5.30                                 | 3.30                                 | -2.73                       | [16]   |
| Peripheral subunit-binding domain, Dihydrolipoamide acetyltransferase | 2PDD           | Two           | $\alpha$ | 42         | 4.26                    | 4.26                                 | 2.35                                 | -2.61                       | [18]   |

|                                            |                   |     |          |     |       |       |       |        |      |
|--------------------------------------------|-------------------|-----|----------|-----|-------|-------|-------|--------|------|
| E3-binding domain of BBL                   | 2WXC              | Two | $\alpha$ | 47  | 3.47  | 4.86  | 2.87  | -2.73  | [15] |
| Cold shock protein, <i>B. caldolyticus</i> | 1C9O              | Two | $\beta$  | 66  | 0.09  | 3.13  | -0.17 | -4.50  | [15] |
| Cold shock protein, <i>B. subtilis</i>     | 1CSP              | Two | $\beta$  | 67  | 1.17  | 2.82  | 1.00  | -2.49  | [15] |
| Formin Binding Protein 28                  | 1E0L              | Two | $\beta$  | 37  | 4.00  | 4.60  | 3.73  | -1.18  | [15] |
| WW prototype                               | 1E0M              | Two | $\beta$  | 37  | 3.34  | 3.87  | 3.08  | -1.07  | [15] |
| 9th fibronectin domain                     | 1FNF              | Two | $\beta$  | 90  | -0.96 | -0.39 | -1.26 | -1.18  | [15] |
| Cold shock protein, <i>T. maritima</i>     | 1G6P              | Two | $\beta$  | 66  | -1.13 | 2.74  | -1.74 | -6.10  | [15] |
| Hisactophilin                              | 1HCD              | Two | $\beta$  | 117 | -2.82 | 1.35  | -4.69 | -8.23  | [19] |
| sso7d                                      | 1JIC              | Two | $\beta$  | 62  | 0.26  | 3.04  | -1.39 | -6.04  | [15] |
| Abp1 SH3 domain                            | 1JO8              | Two | $\beta$  | 58  | -0.91 | 1.09  | -1.17 | -3.08  | [14] |
| Fibronectin type III WL-12 chitinase A1    | 1K85<br>(559-644) | Two | $\beta$  | 86  | -1.65 | 0.61  | -3.04 | -4.98  | [15] |
| E2 component alpha-ketoacid dehydrogenase  | 1K8M              | Two | $\beta$  | 87  | -2.04 | -0.39 | -3.39 | -4.09  | [15] |
| Yes kinase-associated protein              | 1K9Q<br>(5-44)    | Two | $\beta$  | 40  | 3.04  | 3.65  | 2.91  | -1.01  | [15] |
| Internalin B SH3 domain                    | 1M9S<br>(391-466) | Two | $\beta$  | 76  | 0.04  | 1.74  | -0.74 | -3.38  | [14] |
| Cold shock protein, <i>E. coli</i>         | 1MJC              | Two | $\beta$  | 69  | 0.69  | 2.30  | 0.61  | -2.31  | [15] |
| Beta-hairpin                               | 1PGB<br>(41-56)   | Two | $\beta$  | 16  | 5.21  | 5.21  | 5.21  | 0.00   | [15] |
| PinWW                                      | 1PIN<br>(6-39)    | Two | $\beta$  | 34  | 3.95  | 4.04  | 1.82  | -3.02  | [15] |
| PI3 SH3 domain                             | 1PNJ              | Two | $\beta$  | 84  | -2.08 | -0.43 | -3.17 | -3.73  | [15] |
| Oncoprotein p13mtcp1                       | 1QTU<br>(1-109)   | Two | $\beta$  | 109 | -3.69 | 0.00  | -4.78 | -6.52  | [15] |
| Fyn SH3 domain                             | 1SHF              | Two | $\beta$  | 59  | -0.87 | 2.13  | -1.87 | -5.45  | [14] |
| Spectrin SH3 domain                        | 1SHG              | Two | $\beta$  | 57  | -1.61 | 0.48  | -2.08 | -3.50  | [14] |
| Src SH3 domain                             | 1SRL              | Two | $\beta$  | 56  | 0.17  | 1.91  | -0.56 | -3.38  | [14] |
| Fibronectin type III tenascin              | 1TEN              | Two | $\beta$  | 89  | -1.91 | 0.48  | -3.34 | -5.21  | [15] |
| 18th module of muscle protein twitchin     | 1WIT              | Two | $\beta$  | 93  | -2.56 | 0.17  | -3.56 | -5.09  | [15] |
| Sho1 SH3 domain                            | 2VKN              | Two | $\beta$  | 66  | -0.35 | 0.92  | -1.08 | -2.73  | [14] |
| Symfoil1                                   | 3O49              | Two | $\beta$  | 123 | -3.08 | 0.74  | -3.91 | -6.34  | [20] |
| Symfoil4P                                  | 3O4D              | Two | $\beta$  | 123 | -4.69 | 2.13  | -5.99 | -11.08 | [20] |

|                                             |                   |       |               |     |       |       |       |        |      |
|---------------------------------------------|-------------------|-------|---------------|-----|-------|-------|-------|--------|------|
| ThreeFoil                                   | 3PG0              | Two   | $\beta$       | 140 | -7.43 | -3.87 | -8.95 | -6.93  | [21] |
| Muscle acylphosphatase                      | 1APS              | Two   | $\alpha\beta$ | 98  | -3.17 | -0.69 | -3.91 | -4.38  | [14] |
| C-terminal domain of protein L9             | 1DIV<br>(58-149)  | Two   | $\alpha\beta$ | 92  | -1.91 | 1.43  | -3.43 | -6.64  | [14] |
| N-terminal domain of protein L9             | 1DIV<br>(1-56)    | Two   | $\alpha\beta$ | 56  | 0.83  | 2.87  | 0.00  | -3.90  | [14] |
| LysM Domain                                 | 1E0G              | Two   | $\alpha\beta$ | 48  | 1.61  | 3.04  | 1.02  | -2.75  | [15] |
| FK506 binding protein                       | 1FKB              | Two   | $\alpha\beta$ | 107 | -2.26 | 0.69  | -3.52 | -5.75  | [14] |
| Apoflavodoxin, <i>Anabaena</i>              | 1FTG              | Two   | $\alpha\beta$ | 168 | -0.09 | 1.22  | -1.17 | -3.26  | [15] |
| Tm1083                                      | 1J5U              | Two   | $\alpha\beta$ | 123 | -0.39 | 2.97  | -2.28 | -7.17  | [14] |
| Chemotaxis protein CheW                     | 1K0S              | Two   | $\alpha\beta$ | 143 | -2.17 | 3.21  | -5.25 | -11.55 | [14] |
| Cyclophilin A                               | 1LOP              | Two   | $\alpha\beta$ | 164 | -1.30 | 2.87  | -4.52 | -10.07 | [15] |
| Ribosomal protein L23                       | 1N88              | Two   | $\alpha\beta$ | 96  | -1.04 | 0.87  | -1.69 | -3.50  | [14] |
| ADAh2                                       | 1O6X              | Two   | $\alpha\beta$ | 81  | 0.65  | 2.95  | -0.17 | -4.27  | [14] |
| B1 domain of protein G                      | 1PGB              | Two   | $\alpha\beta$ | 56  | -0.17 | 2.74  | -0.74 | -4.74  | [14] |
| Histidine containing phosphocarrier protein | 1POH              | Two   | $\alpha\beta$ | 85  | -1.30 | 1.17  | -2.69 | -5.27  | [15] |
| C-terminal domain of spore coat protein S   | 1PRS<br>(91-173)  | Two   | $\alpha\beta$ | 83  | -3.52 | -0.87 | -4.04 | -4.32  | [15] |
| N-terminal domain spore coat protein S      | 1PRS<br>(1-90)    | Two   | $\alpha\beta$ | 90  | -2.00 | 1.30  | -4.08 | -7.35  | [15] |
| Ras binding domain                          | 1RFA              | Two   | $\alpha\beta$ | 78  | -0.09 | 3.65  | -1.22 | -6.64  | [14] |
| Ribosomal protein S6                        | 1RIS              | Two   | $\alpha\beta$ | 97  | -1.69 | 2.65  | -3.60 | -8.53  | [14] |
| Src SH2 domain                              | 1SPR              | Two   | $\alpha\beta$ | 103 | -0.61 | 3.78  | -1.52 | -7.23  | [14] |
| Ubiquitin                                   | 1UBQ              | Two   | $\alpha\beta$ | 76  | -0.65 | 3.17  | -2.95 | -8.35  | [14] |
| Spliceosomal protein U1A                    | 1URN              | Two   | $\alpha\beta$ | 96  | -0.17 | 2.01  | -5.09 | -9.68  | [14] |
| Common-type acylphosphatase                 | 2ACY              | Two   | $\alpha\beta$ | 98  | -1.91 | 0.35  | -2.82 | -4.32  | [15] |
| Chymotrypsin inhibitor 2                    | 2CI2              | Two   | $\alpha\beta$ | 64  | -1.52 | 2.52  | -4.47 | -9.54  | [14] |
| B1 domain of Protein L                      | 2PTL<br>(18-77)   | Two   | $\alpha\beta$ | 60  | -0.61 | 1.78  | -1.43 | -4.38  | [14] |
| Pit1 homeodomain                            | 1AU7<br>(103-160) | Multi | $\alpha$      | 58  | 3.21  | 4.21  | 2.08  | -2.90  | [15] |
| FKBP-Rapamycin binding domain               | 1AUE              | Multi | $\alpha$      | 92  | -1.04 | 2.61  | -2.35 | -6.75  | [15] |
| p19ink4d CDK inhibitor                      | 1BD8              | Multi | $\alpha$      | 156 | -0.83 | 1.26  | -1.00 | -3.08  | [15] |

|                                              |                   |       |               |     |       |       |       |        |      |
|----------------------------------------------|-------------------|-------|---------------|-----|-------|-------|-------|--------|------|
| Engrailed homeodomain                        | 1ENH              | Multi | $\alpha$      | 54  | 3.52  | 4.56  | 3.30  | -1.72  | [15] |
| Acyl-coenzyme A binding protein, yeast       | 1ST7              | Multi | $\alpha$      | 86  | -0.17 | 3.69  | 2.78  | -1.24  | [15] |
| FF domain, human hypa                        | 1UZC              | Multi | $\alpha$      | 69  | 1.00  | 3.30  | 0.61  | -3.67  | [15] |
| Tumour suppressor protein p16                | 2A5E<br>(9-156)   | Multi | $\alpha$      | 148 | 0.17  | 1.52  | 0.09  | -1.95  | [15] |
| Phage 434 cro protein                        | 2CRO              | Multi | $\alpha$      | 64  | 0.13  | 1.61  | -0.22 | -2.49  | [15] |
| T4 lysozyme                                  | 2LZM              | Multi | $\alpha$      | 164 | -2.48 | 1.78  | -6.08 | -10.72 | [15] |
| Myotrophin                                   | 2MYO              | Multi | $\alpha$      | 118 | -0.13 | 2.04  | -1.39 | -4.68  | [15] |
| Ileal lipid binding protein                  | 1EAL              | Multi | $\beta$       | 127 | -1.22 | 0.56  | -2.13 | -3.67  | [15] |
| Intestinal fatty acid binding protein        | 1IFC              | Multi | $\beta$       | 131 | -1.22 | 1.48  | -2.00 | -4.74  | [15] |
| FGF-1                                        | 1JQZ              | Multi | $\beta$       | 136 | -2.87 | 0.56  | -3.08 | -4.98  | [20] |
| Cellular retinol binding protein II          | 1OPA              | Multi | $\beta$       | 133 | -2.17 | 0.61  | -4.00 | -6.28  | [15] |
| Barnase                                      | 1RNB              | Multi | $\beta$       | 109 | -1.87 | 1.13  | -3.95 | -6.93  | [15] |
| Titin IG repeat 27                           | 1TIU              | Multi | $\beta$       | 89  | -3.00 | 1.56  | -3.30 | -6.64  | [15] |
| 10th type III fibronectin domain             | 1TTF              | Multi | $\beta$       | 94  | -0.22 | 2.39  | -3.65 | -8.23  | [15] |
| Apical domain of GroEL                       | 1AON<br>(191-345) | Multi | $\alpha\beta$ | 155 | -1.48 | -0.65 | -2.48 | -2.49  | [15] |
| Third PDZ domain from PSD-95                 | 1BFE              | Multi | $\alpha\beta$ | 110 | -0.09 | 1.30  | -1.48 | -3.79  | [15] |
| Barstar                                      | 1BTA              | Multi | $\alpha\beta$ | 89  | -0.61 | 1.48  | -1.17 | -3.61  | [15] |
| Cellular retinoic acid binding protein I     | 1CBI              | Multi | $\alpha\beta$ | 136 | -2.91 | -1.39 | -4.26 | -3.91  | [15] |
| PDZ2 domain from PTP-BL                      | 1GM1              | Multi | $\alpha\beta$ | 94  | -0.52 | 0.35  | -1.00 | -1.84  | [15] |
| Hydrogenase maturation protein               | 1GXT              | Multi | $\alpha\beta$ | 88  | -0.35 | 1.91  | -2.95 | -6.64  | [15] |
| Indole-3-glycerolphosphate synthase          | 1IGS<br>(27-248)  | Multi | $\alpha\beta$ | 222 | -3.87 | -2.00 | -5.91 | -5.33  | [15] |
| Staphylococcal nuclease                      | 1JOO              | Multi | $\alpha\beta$ | 149 | -2.30 | 1.00  | -3.65 | -6.34  | [15] |
| C-terminal domain of phosphoglycerate kinase | 1PHP<br>(176-394) | Multi | $\alpha\beta$ | 219 | -2.21 | -1.69 | -4.69 | -4.09  | [15] |
| N-terminal domain of phosphoglycerate kinase | 1PHP<br>(1-175)   | Multi | $\alpha\beta$ | 175 | -0.56 | 1.00  | -1.82 | -3.85  | [15] |
| Trp-Synthase $\alpha$ -subunit               | 1QOP<br>(Chain A) | Multi | $\alpha\beta$ | 265 | -2.48 | -1.09 | -3.87 | -3.79  | [15] |
| Dihydrofolate reductase                      | 1RA9              | Multi | $\alpha\beta$ | 159 | -2.26 | -1.39 | -2.65 | -1.72  | [15] |

|                                        |      |       |               |     |       |       |        |        |      |
|----------------------------------------|------|-------|---------------|-----|-------|-------|--------|--------|------|
| Cell-cycle regulatory protein p13suc1  | 1SCE | Multi | $\alpha\beta$ | 97  | -0.43 | 1.82  | -2.65  | -6.10  | [15] |
| Carbonic anhydrase                     | 1V9E | Multi | $\alpha\beta$ | 259 | -4.60 | -1.82 | -10.42 | -11.73 | [15] |
| Ribonuclease H1, <i>E. coli</i>        | 2RN2 | Multi | $\alpha\beta$ | 155 | -2.00 | 0.04  | -5.21  | -7.17  | [15] |
| Villin 14T                             | 2VIK | Multi | $\alpha\beta$ | 126 | -0.69 | 2.17  | -1.78  | -5.39  | [15] |
| Chemotactic protein                    | 3CHY | Multi | $\alpha\beta$ | 128 | -0.56 | 0.43  | -1.91  | -3.20  | [15] |
| Ribonuclease H1, <i>C. tepidum</i>     | 3H08 | Multi | $\alpha\beta$ | 139 | -1.74 | 0.83  | -6.08  | -9.42  | [15] |
| <b>Average (# proteins)</b>            |      |       |               |     |       |       |        |        |      |
| Full (108)                             |      |       |               |     | -0.28 | 2.00  | -1.50  | -4.77  |      |
| Two-State (74)                         |      |       |               |     | 0.02  | 2.42  | -1.03  | -4.71  |      |
| Multi-State (34)                       |      |       |               |     | -1.06 | 1.08  | -2.50  | -4.89  |      |
| Alpha (33)                             |      |       |               |     | 1.54  | 3.50  | 0.68   | -3.84  |      |
| Beta (34)                              |      |       |               |     | -0.83 | 1.54  | -1.78  | -4.53  |      |
| Mixed (41) <sup>b</sup>                |      |       |               |     | -1.30 | 1.17  | -3.01  | -5.71  |      |
| Maxwell (28) <sup>c</sup>              |      |       |               |     | -0.54 | 2.27  | -1.81  | -5.56  |      |
| <b>Min (# proteins)</b>                |      |       |               |     |       |       |        |        |      |
| Full (108)                             |      |       |               |     | -7.43 | -3.87 | -10.42 | -11.73 |      |
| Two-State (74)                         |      |       |               |     | -7.43 | -3.87 | -8.95  | -11.55 |      |
| Multi-State (34)                       |      |       |               |     | -4.60 | -2.00 | -10.42 | -11.73 |      |
| Alpha (33)                             |      |       |               |     | -2.48 | 0.88  | -6.08  | -10.72 |      |
| Beta (34)                              |      |       |               |     | -7.43 | -3.87 | -8.95  | -11.08 |      |
| Mixed (41) <sup>b</sup>                |      |       |               |     | -4.06 | -2.00 | -10.42 | -11.73 |      |
| Maxwell (28) <sup>c</sup>              |      |       |               |     | -3.17 | -0.69 | -5.23  | -11.55 |      |
| <b>Max (# proteins)</b>                |      |       |               |     |       |       |        |        |      |
| Full (108)                             |      |       |               |     | 5.65  | 5.43  | 5.73   | 0.83   |      |
| Two-State (74)                         |      |       |               |     | 5.65  | 5.43  | 5.73   | 0.83   |      |
| Multi-State (34)                       |      |       |               |     | 3.52  | 4.56  | 3.30   | -1.24  |      |
| Alpha (33)                             |      |       |               |     | 5.65  | 5.43  | 5.73   | 0.83   |      |
| Beta (34)                              |      |       |               |     | 5.21  | 5.21  | 5.21   | 0.00   |      |
| Mixed (41) <sup>b</sup>                |      |       |               |     | 1.61  | 3.78  | 1.02   | -1.72  |      |
| Maxwell (28) <sup>c</sup>              |      |       |               |     | 2.78  | 4.52  | 1.95   | -2.73  |      |
| <b>Standard Deviation (# proteins)</b> |      |       |               |     |       |       |        |        |      |
| Full (108)                             |      |       |               |     | 2.40  | 1.88  | 2.92   | 2.53   |      |
| Two-State (74)                         |      |       |               |     | 2.60  | 1.83  | 2.92   | 2.52   |      |
| Multi-State (34)                       |      |       |               |     | 1.66  | 1.66  | 2.69   | 2.58   |      |
| Alpha (33)                             |      |       |               |     | 2.27  | 1.36  | 2.59   | 2.25   |      |
| Beta (34)                              |      |       |               |     | 2.59  | 1.75  | 2.90   | 2.42   |      |
| Mixed (41) <sup>b</sup>                |      |       |               |     | 1.29  | 1.63  | 2.05   | 2.57   |      |
| Maxwell (28) <sup>c</sup>              |      |       |               |     | 1.32  | 1.23  | 1.85   | 2.37   |      |

<sup>a</sup> all values refer to 25 °C

<sup>b</sup> Mixed refers to the  $\alpha\beta$  structure class.

<sup>c</sup> the set "Maxwell" is listed as source "[14]".

$\log k_f = \log k_u$  is the experimentally determined mid-transition (denaturation midpoint) folding (equal to unfolding) rate, where the thermodynamic stability of the protein is zero.

$\Delta G_{F-U} = G_F - G_U = -RT \ln ( k_f / k_u )$ , where R is the gas constant and T is the absolute temperature in Kelvin (298.15), gives the Gibbs free energy of the folded state relative to the unfolded state.

**Table SIII. Single Mutation Effects on Folding and Unfolding Rates**

| Protein                           | Number of Mutations | Average Change in $k_f$ (x-fold) <sup>a</sup> | Average Change in $k_u$ (y-fold) <sup>a</sup> | Relative change (y-fold / x-fold) |
|-----------------------------------|---------------------|-----------------------------------------------|-----------------------------------------------|-----------------------------------|
| Muscle AcP                        | 22                  | 3.16                                          | 8.12                                          | 2.57                              |
| FKBP12                            | 34                  | 2.25                                          | 29.64                                         | 13.18                             |
| L23                               | 17                  | 2.03                                          | 104.11                                        | 51.35                             |
| CTL9                              | 24                  | 3.98                                          | 131.22                                        | 33.00                             |
| $\alpha$ -spectrin SH3 (D48G)     | 14                  | 5.12                                          | 13.45                                         | 2.63                              |
| CI2                               | 65                  | 3.32                                          | 65.21                                         | 19.64                             |
| Src-SH3                           | 54                  | 2.79                                          | 9.22                                          | 3.30                              |
| Protein L                         | 68                  | 1.75                                          | 44.83                                         | 25.60                             |
| Fyn-SH3                           | 34                  | 7.01                                          | 26.90                                         | 3.84                              |
| bACBP                             | 30                  | 3.54                                          | 134.25                                        | 37.89                             |
| Ubiquitin                         | 27                  | 4.41                                          | 232.79                                        | 52.75                             |
| Protein G                         | 31                  | 2.87                                          | 14.97                                         | 5.22                              |
| ADA2h                             | 18                  | 1.78                                          | 4.70                                          | 2.64                              |
| NTL9                              | 24                  | 1.94                                          | 18.48                                         | 9.54                              |
| sso7d                             | 20                  | 2.15                                          | 7.19                                          | 3.35                              |
| CspB                              | 21                  | 3.01                                          | 7.89                                          | 2.62                              |
| Im9                               | 25                  | 12.32                                         | 83.70                                         | 6.80                              |
| cyt b562                          | 39                  | 2.82                                          | 173.39                                        | 61.59                             |
| yACBP                             | 18                  | 5.28                                          | 161.14                                        | 30.54                             |
| FBP28 WW                          | 45                  | 1.40                                          | 2.83                                          | 2.02                              |
| E3DB (F166W)                      | 22                  | 3.30                                          | 16.80                                         | 5.08                              |
| BdpA (Y15W)                       | 45                  | 2.84                                          | 12.97                                         | 4.57                              |
| BdpA (N29H,Q33W)                  | 20                  | 1.70                                          | 9.32                                          | 5.49                              |
| BpdA (E48W)                       | 20                  | 2.35                                          | 6.39                                          | 2.72                              |
| POB (L146A, Y166W)                | 22                  | 3.37                                          | 6.99                                          | 2.07                              |
| Per Protein Average <sup>b</sup>  | 25                  | 3.46                                          | 53.06                                         | <b>15.34</b>                      |
| Per Mutation Average <sup>c</sup> | 759                 | 3.30                                          | 52.58                                         | <b>15.95</b>                      |

<sup>a</sup> change is calculated as  $e^{|\ln k_{wt} - \ln k_{mut}|}$ . Thus, a two-fold slower rate or two-fold faster rate for the mutant would both be a 2.0 fold change in rate. Reported values are the average across all mutations for that protein.

<sup>b</sup> average across the dataset weighting each protein equally.

<sup>c</sup> average across the dataset weighting each mutation equally.

It should be noted that the vast majority of mutations in the dataset [22] are simple truncation mutations and hence, the relationships shown may not be representative of a more general set of mutations.

## References: Supplementary Information

1. Plaxco KW, Simons KT, Baker D (1998) Contact order, transition state placement and the refolding rates of single domain proteins. *J. Mol. Biol.* 277:985–94.
2. Ivankov DN, Garbuzynskiy SO, Alm E, Plaxco KW, Baker D, Finkelstein A V (2003) Contact order revisited: influence of protein size on the folding rate. *Protein Sci.* 12:2057–62.
3. Gromiha MM, Selvaraj S (2001) Comparison between long-range interactions and contact order in determining the folding rate of two-state proteins: application of long-range order to folding rate prediction. *J. Mol. Biol.* 310:27–32.
4. Zou T, Ozkan SB (2011) Local and non-local native topologies reveal the underlying folding landscape of proteins. *Phys. Biol.* 8:066011.
5. Zhou H, Zhou Y (2002) Folding rate prediction using total contact distance. *Biophys. J.* 82:458–63.
6. Micheletti C (2003) Prediction of folding rates and transition-state placement from native-state geometry. *Proteins* 51:74–84.
7. Ouyang Z, Liang J (2008) Predicting protein folding rates from geometric contact and amino acid sequence. *Protein Sci.* 17:1256–63.
8. Gutin A, Abkevich V, Shakhnovich E (1996) Chain Length Scaling of Protein Folding Time. *Phys. Rev. Lett.* 77:5433–5436.
9. Koga N, Takada S (2001) Roles of native topology and chain-length scaling in protein folding: a simulation study with a Go-like model. *J. Mol. Biol.* 313:171–80.
10. Kouza M, Li MS, O'brien EP, Hu C-K, Thirumalai D (2006) Effect of finite size on cooperativity and rates of protein folding. *J. Phys. Chem. A* 110:671–6.
11. Lane TJ, Pande VS (2013) Inferring the rate-length law of protein folding. *PLoS One* 8:e78606.
12. Naganathan AN, Muñoz V (2005) Scaling of folding times with protein size. *J. Am. Chem. Soc.* 127:480–1.
13. Wolynes PG (1997) Folding funnels and energy landscapes of larger proteins within the capillarity approximation. *Proc. Natl. Acad. Sci. U. S. A.* 94:6170–5.
14. Maxwell KL, Wildes D, Zarrine-Afsar A, De Los Rios MA, Brown AG, Friel CT, Hedberg L, Horng J-C, Bona D, Miller EJ, et al. (2005) Protein folding: defining a “standard” set of experimental conditions and a preliminary kinetic data set of two-state proteins. *Protein Sci.* 14:602–16.
15. Garbuzynskiy SO, Ivankov DN, Bogatyreva NS, Finkelstein A V (2013) Golden triangle for folding rates of globular proteins. *Proc. Natl. Acad. Sci. U. S. A.* 110:147–50.
16. Bogatyreva NS, Osypov AA, Ivankov DN (2009) KineticDB: a database of protein folding kinetics. *Nucleic Acids Res.* 37:D342–6.
17. Ferguson N, Sharpe TD, Schartau PJ, Sato S, Allen MD, Johnson CM, Rutherford TJ, Fersht AR (2005) Ultra-fast barrier-limited folding in the peripheral subunit-binding domain family. *J. Mol. Biol.* 353:427–46.
18. Spector S, Raleigh DP (1999) Submillisecond folding of the peripheral subunit-binding domain. *J. Mol. Biol.* 293:763–8.

19. Smith MTJ, Meissner J, Esmonde S, Wong HJ, Meiering EM (2010) Energetics and mechanisms of folding and flipping the myristoyl switch in the  $\beta$ -trefoil protein, hisactophilin. *Proc. Natl. Acad. Sci. U. S. A.* 107:20952–7.

20. Lee J, Blaber SI, Dubey VK, Blaber M (2011) A polypeptide “building block” for the  $\beta$ -trefoil fold identified by “top-down symmetric deconstruction”. *J. Mol. Biol.* 407:744–63.

21. Kinetic data for ThreeFoil to be published separately

22. Naganathan AN, Muñoz V (2005) Scaling of folding times with protein size. *J. Am. Chem. Soc.* 127:480–1.
